# Supplementary material for: EVI1 as a Prognostic and Predictive Biomarker of Clear Cell Renal Cell Carcinoma
Source: MDPI journal article supplement (doi:10.3390/cancers12020300), 2020-01-28
Supplement: s1 [file s1]

Palomero et al., Fig. 3B (left panels)

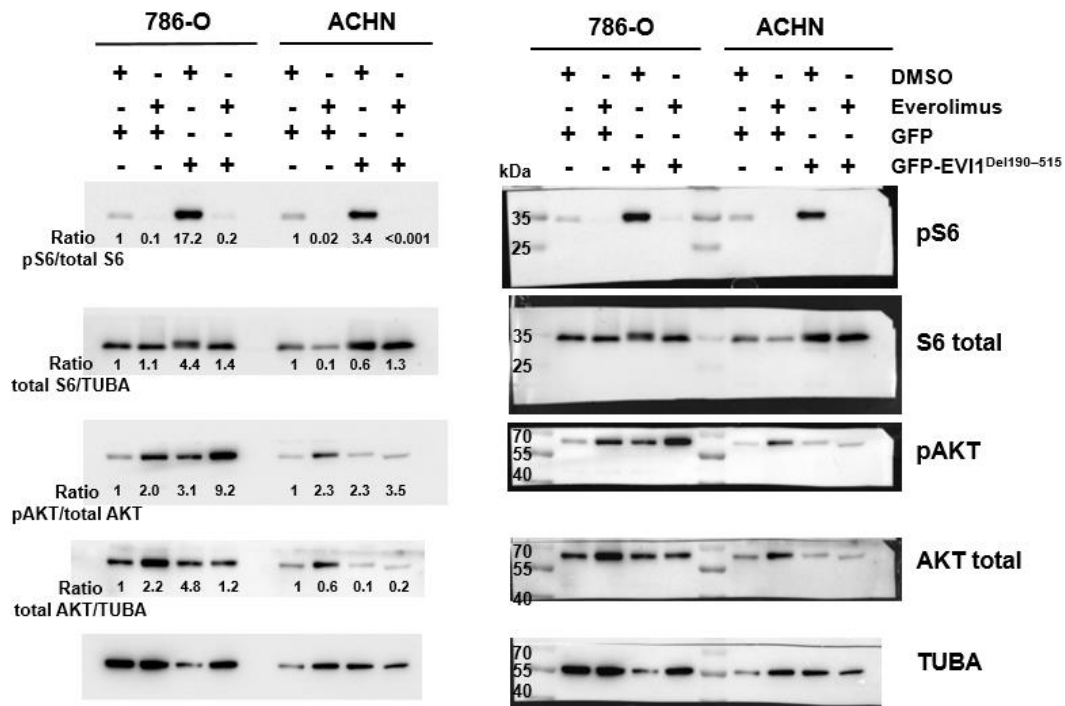

Palomero et al., Fig. 3B (right panels)

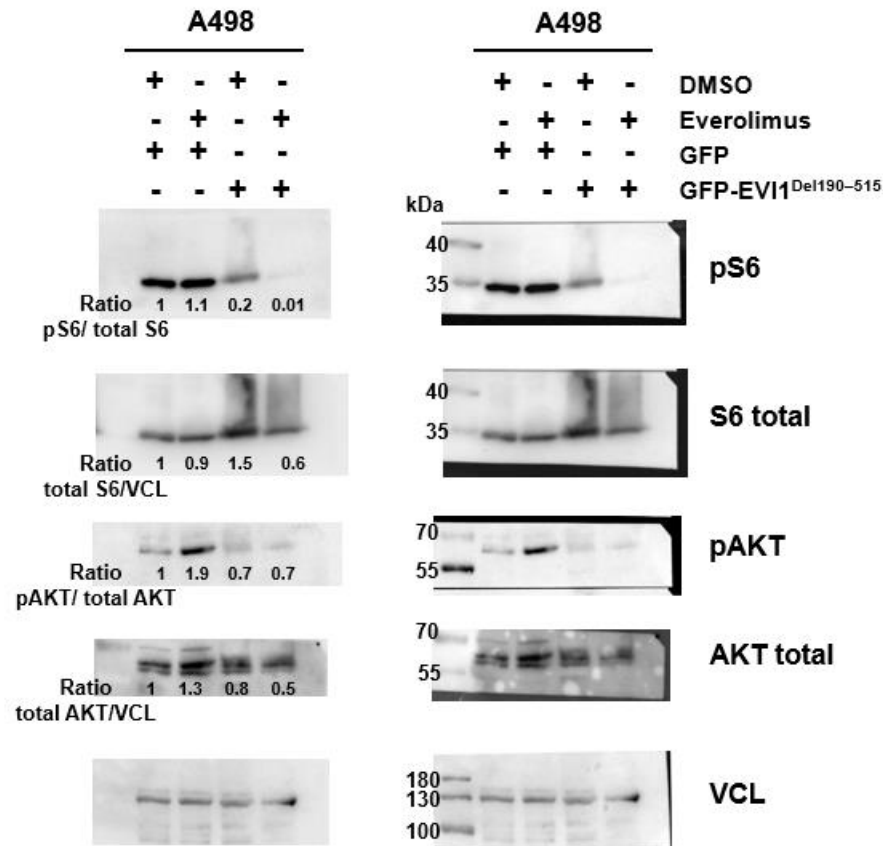

Figure S1. The Whole western blots.
